# Supplementary material for: Structural characterization of surface immobilized platinum hydrides by sensitivity-enhanced 195Pt solid state NMR spectroscopy and DFT calculations
Source: Royal Society of Chemistry journal article supplement (doi:10.1039/d4sc06450j), 2024-11-20
Supplement: d4sc06450j1.pdf [file d4sc06450j1.pdf]

Supporting Information for:

## **Structural Characterization of Surface Immobilized Platinum Hydrides by Sensitivity-Enhanced $^{195}\text{Pt}$ Solid State NMR Spectroscopy and DFT Calculations**

*Benjamin A. Atterberry,<sup>1, 2†</sup> Erik J. Wimmer,<sup>3†</sup> Sina Klostermann,<sup>3</sup> Wolfgang Frey,<sup>3</sup> Johannes Kästner,<sup>3</sup> Deven P. Estes,<sup>3\*</sup> and Aaron J. Rossini<sup>1,2\*</sup>*

†These authors contributed equally.

<sup>1</sup>*Iowa State University, Department of Chemistry, Ames, IA, USA, 50011*

<sup>2</sup>*US DOE Ames National Laboratory, Ames, Iowa, USA, 50011*

<sup>3</sup>*University of Stuttgart, Department of Chemistry, Stuttgart, Baden-Württemberg, Germany, 70569*

### **Corresponding Authors:**

\*Emails: [arossini@iastate.edu](mailto:arossini@iastate.edu), [deven.estes@itc.uni-stuttgart.de](mailto:deven.estes@itc.uni-stuttgart.de)

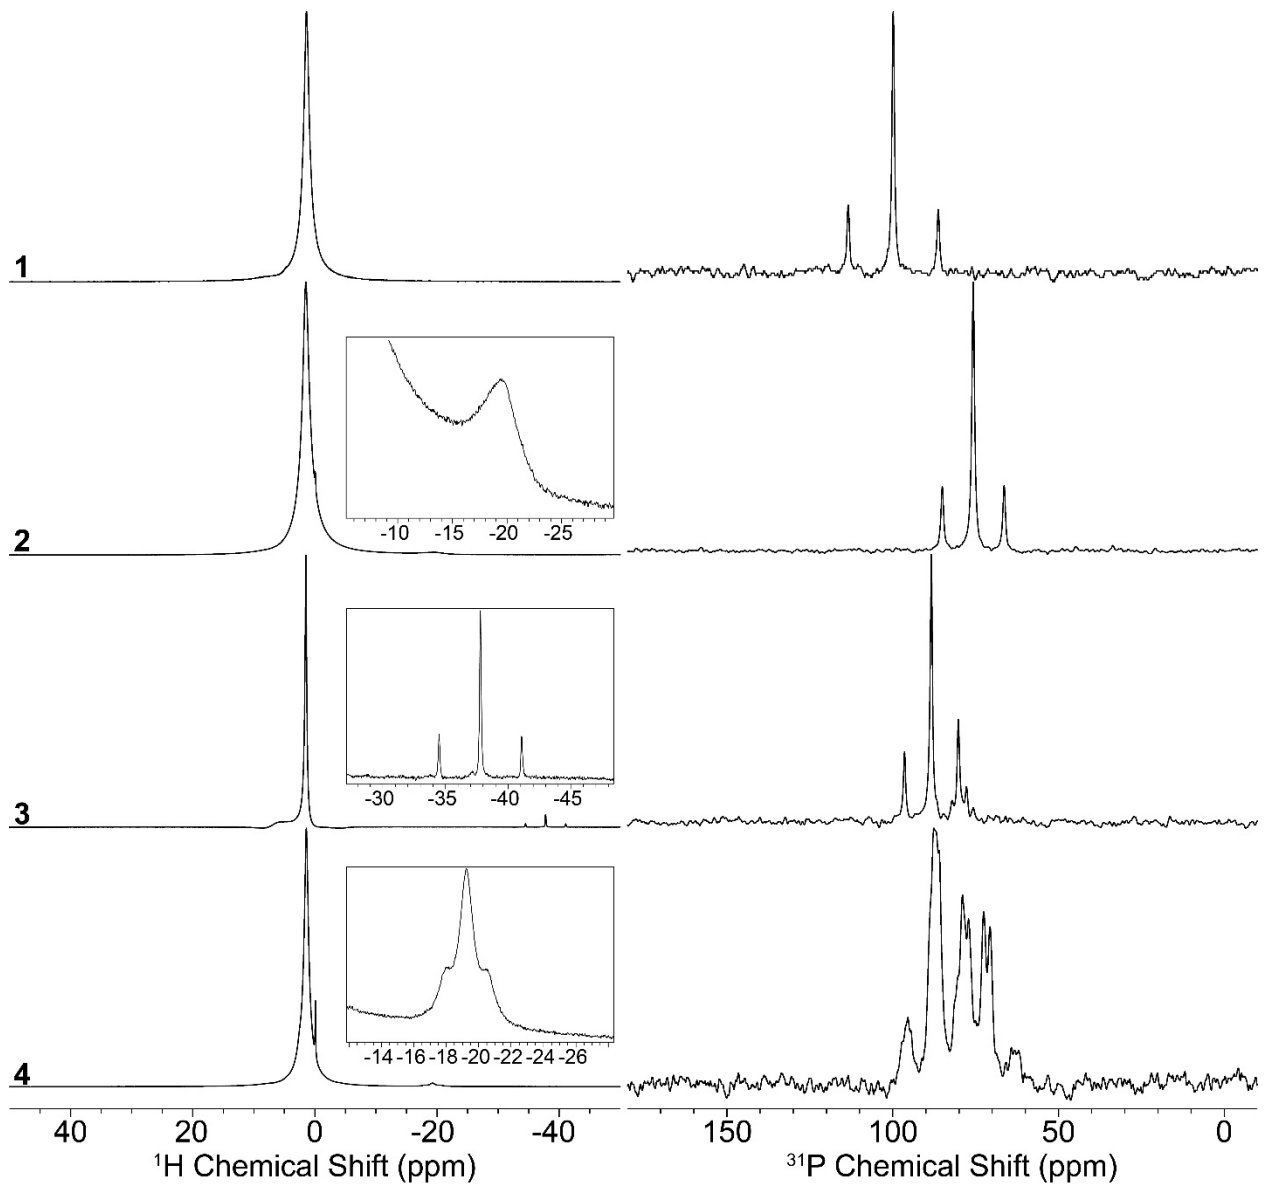

**Figure S1:**  $^1\text{H}$  spin echo and  $^1\text{H}$ - $^{31}\text{P}$  CPMAS spectra for molecular compounds **1** through **4**.

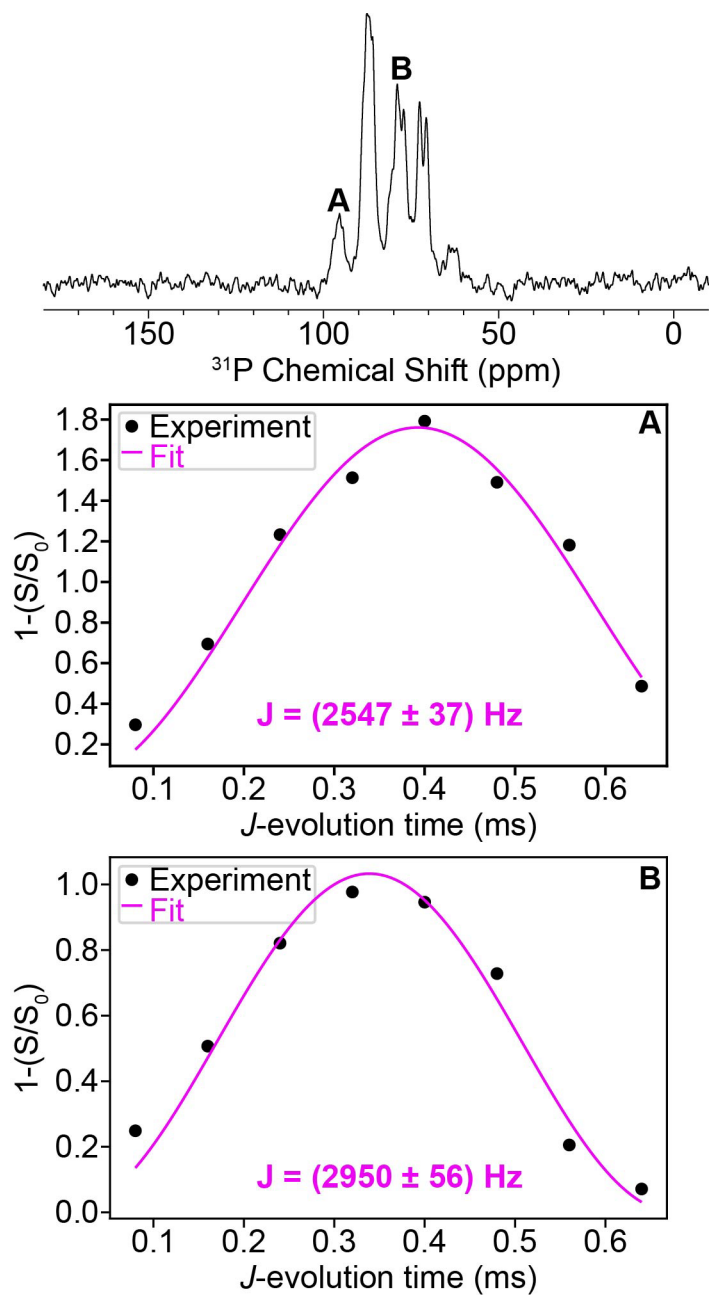

**Figure S2:**  $^{31}\text{P}\{^{195}\text{Pt}\}$   $J$ -evolution plots of **4** for different  $^{31}\text{P}$  peaks. **A** and **B** denote the 95 ppm and 78 ppm peaks, respectively.

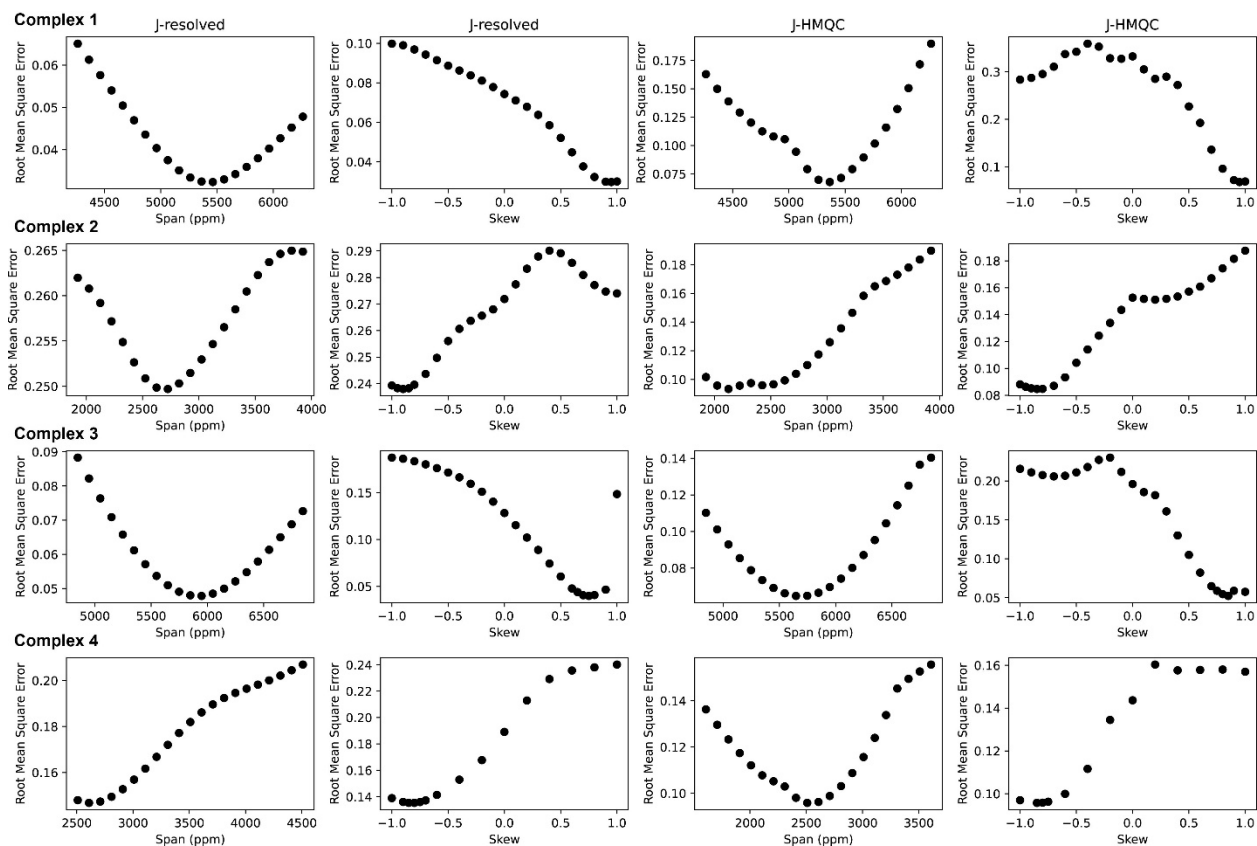

**Figure S3:** Root mean square error plots of the span ( $\Omega$ ) and skew ( $\kappa$ ) for the *J*-resolved and *J*-HMQC sideband selective experiments on 1-4.

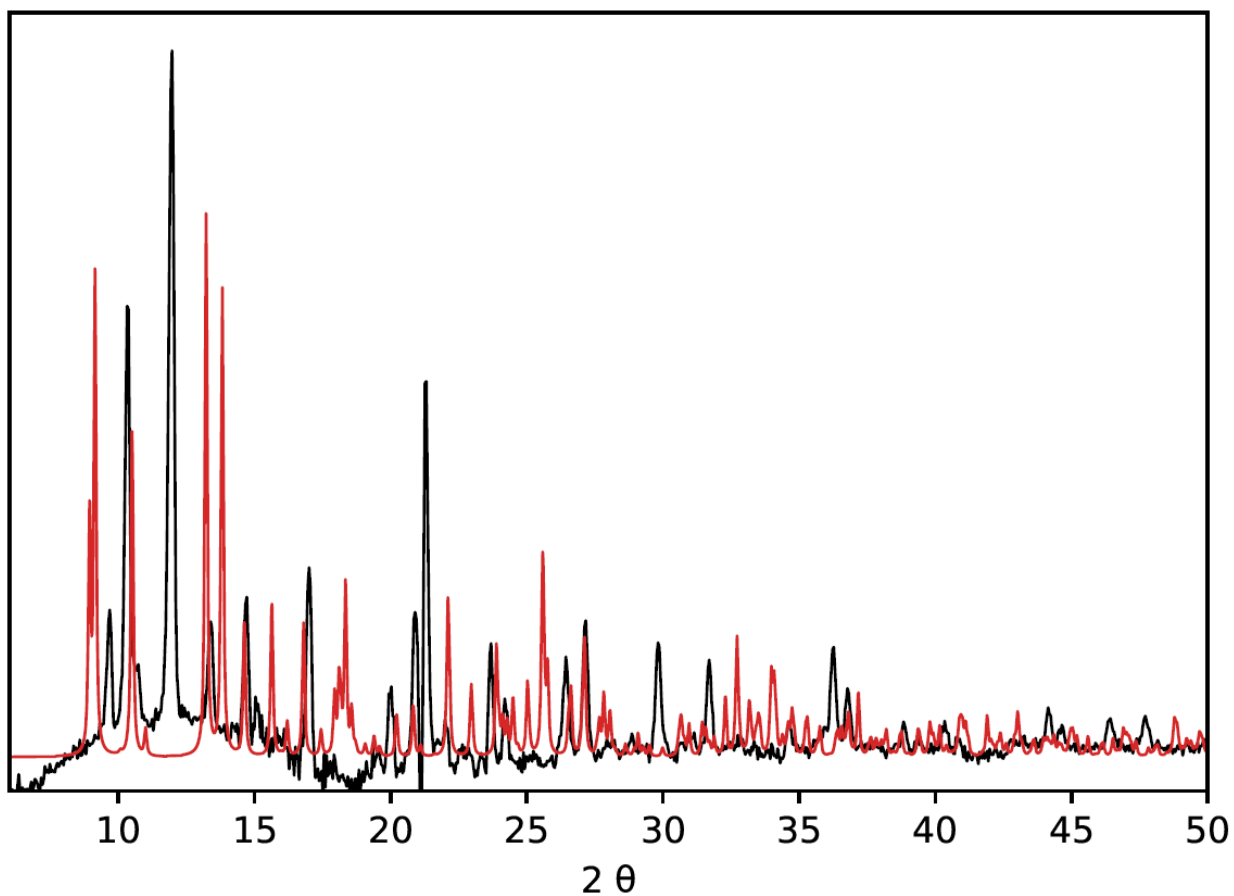

**Figure S4:** Experimental powder X-ray diffraction pattern of **3** (black). The pattern calculated from the single crystal X-ray diffraction structure of **3** is also shown (red). The disagreement between the two patterns occurs because the compound has lost the solvated  $\text{CH}_2\text{Cl}_2$  which was incorporated into the lattice.

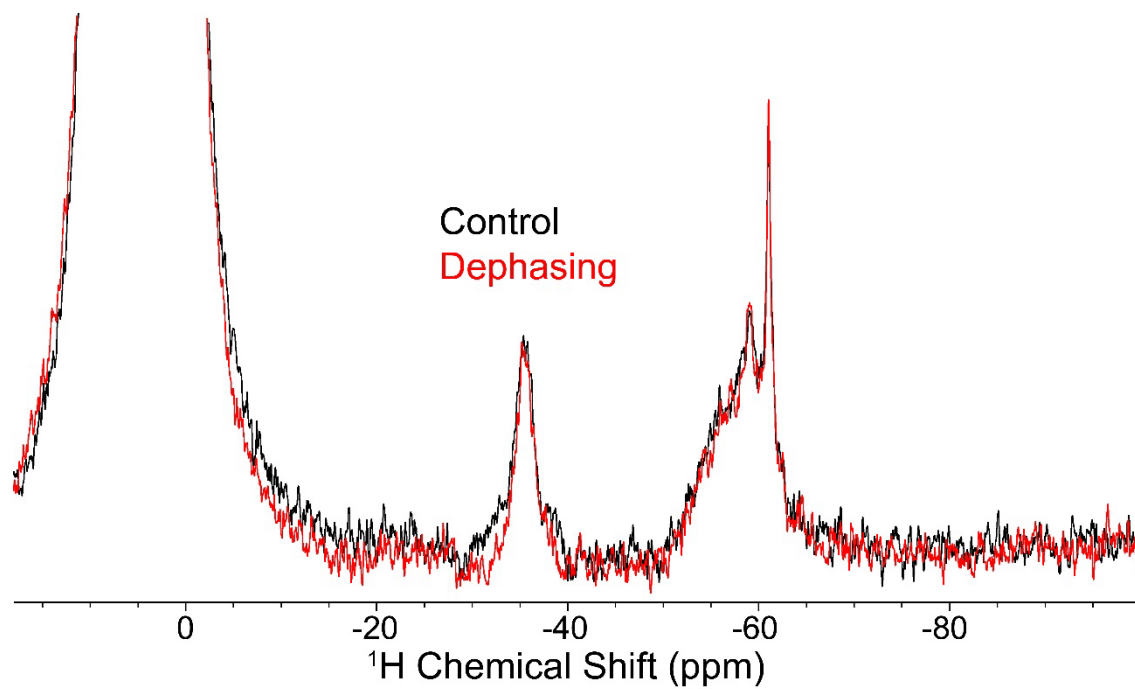

**Figure S5:**  $^1\text{H}\{^{195}\text{Pt}\}$   $J$ -resolved control and dephasing spectra for  $1/\text{SiO}_2\text{-Al}_2\text{O}_3$  acquired at room temperature and 25 kHz MAS.

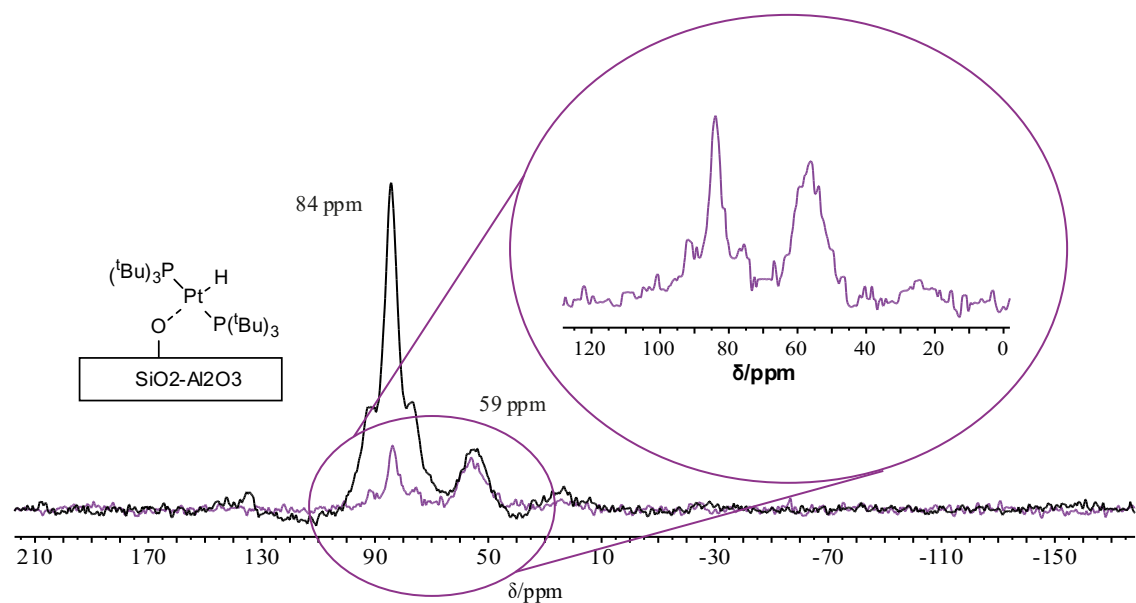

**Figure S6:**  $^{31}\text{P}$  CPMAS NMR control experiment on  $1/\text{SiO}_2\text{-Al}_2\text{O}_3$  impregnated with TEMPO dissolved in TCE (magenta) and without impregnation (grey). All spectra were recorded at room temperature.

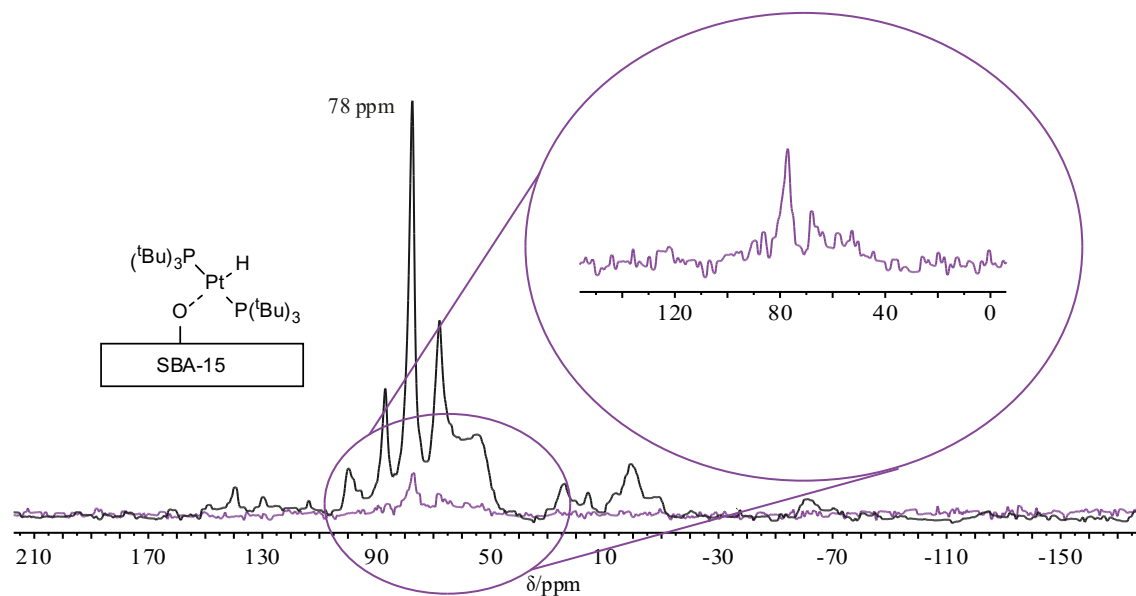

**Figure S7:**  $^{31}\text{P}$  CPMAS NMR control experiment on  $1/\text{SBA-15}$  impregnated with TEMPO dissolved in TCE (magenta) and without impregnation (grey).

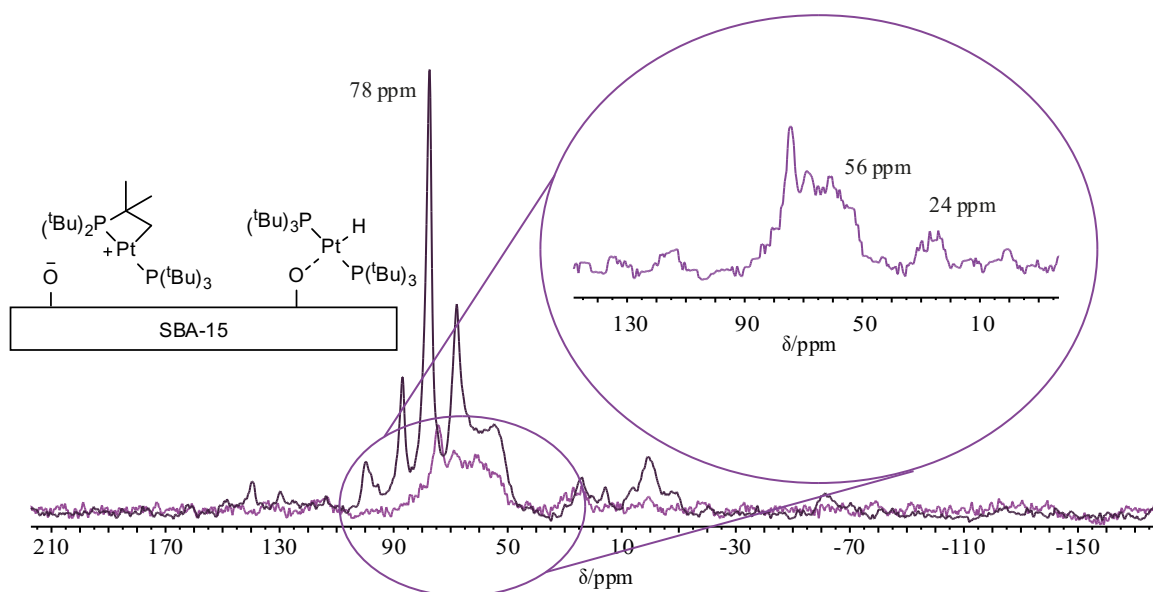

**Figure S8:**  $^{31}\text{P}$  CPMAS ssNMR spectra of 1/SBA-15, freshly prepared (grey) and >1 year old (magenta).



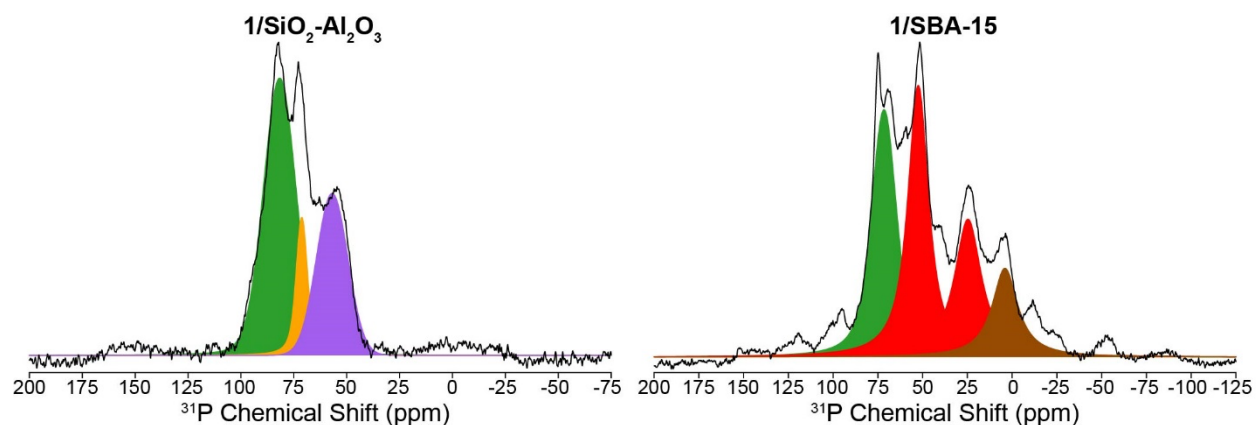

**Figure S9:** Peak fits of the DNP-enhanced  $^1\text{H}$ - $^{31}\text{P}$  CPMAS spin echo ssNMR spectra of  $1/\text{SiO}_2\text{-Al}_2\text{O}_3$  and  $1/\text{SBA-15}$ . The fits were conducted in ssNake.

**Table S1:** Chemical shifts and relative integration for the  $^{31}\text{P}$  sites of the two surface-supported complexes

| <b><math>1/\text{SiO}_2\text{-Al}_2\text{O}_3</math></b> |                                                        |                                                 |
|----------------------------------------------------------|--------------------------------------------------------|-------------------------------------------------|
| <b>Site</b>                                              | <b><math>^{31}\text{P}</math> Chemical Shift (ppm)</b> | <b>Relative Integration from Analytical Fit</b> |
| <b>Hydride (Green)</b>                                   | 81.67                                                  | 57.66%                                          |
| <b>Phosphine Oxide (Orange)</b>                          | 71.23                                                  | 11.70%                                          |
| <b>Protonated Phosphine (Purple)</b>                     | 56.88                                                  | 30.64%                                          |
| <b><math>1/\text{SBA-15}</math></b>                      |                                                        |                                                 |
| <b>Site</b>                                              | <b><math>^{31}\text{P}</math> Chemical Shift (ppm)</b> | <b>Relative Integration from Analytical Fit</b> |
| <b>Hydride (Green)</b>                                   | 71.57                                                  | 30.91%                                          |
| <b>C-H Activated (Red)</b>                               | 52.44                                                  | 32.88%                                          |
| <b>C-H Activated (Red)</b>                               | 24.66                                                  | 22.55%                                          |
| <b>Oxidized Decomposition (Brown)</b>                    | 4.000                                                  | 13.66%                                          |

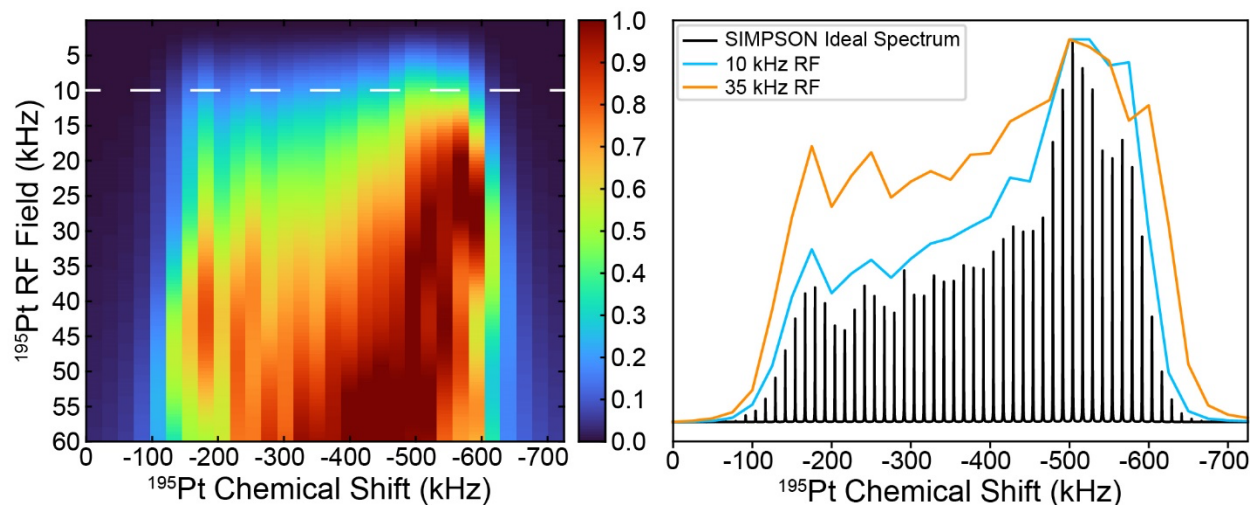

**Figure S10:** (Left) SIMPSON calculated  $^{31}\text{P}$  signal dephasing for  $^1\text{H}\text{-}^{31}\text{P}\{^{195}\text{Pt}\}$   $J$ -resolved sideband selective experiments as a function of the  $^{195}\text{Pt}$  saturation radiofrequency (RF) field for complex  $1/\text{SiO}_2\text{-Al}_2\text{O}_3$ . A white dashed line indicates the optimal RF. Simulations used a 12.5 kHz spinning frequency and 120  $\mu\text{s}$  saturation pulses. (Right) Graph of the SIMPSON calculated ideal  $^{195}\text{Pt}$  ssNMR spectrum of  $1/\text{SiO}_2\text{-Al}_2\text{O}_3$  (black) along with simulated  $^1\text{H}\text{-}^{31}\text{P}\{^{195}\text{Pt}\}$   $J$ -resolved sideband selective experiments that used 10 kHz (blue) and 35 kHz (orange)  $^{195}\text{Pt}$  saturation RF fields.

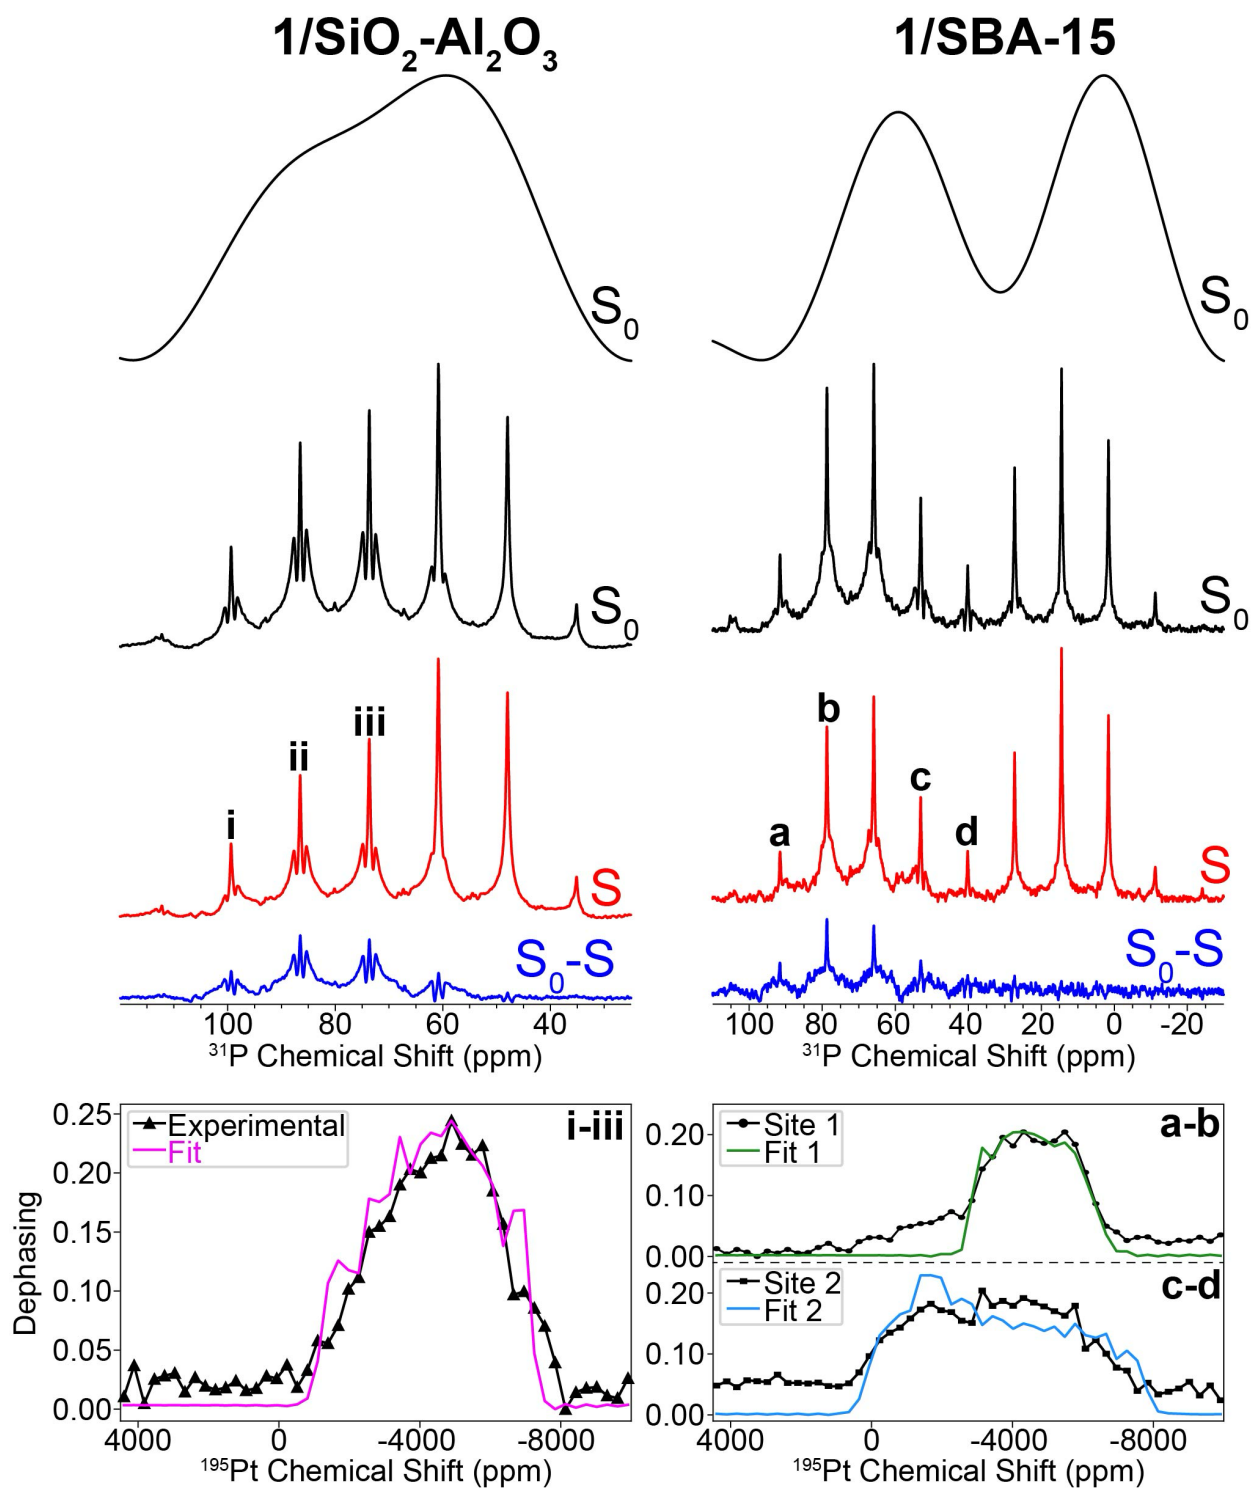

**Figure S11:**  $^{31}\text{P}\{^{195}\text{Pt}\}$   $S_0$ ,  $S$ , and  $S_0-S$   $J$ -resolved ssNMR spectra showing the CPMG spikelets that were used to construct the  $^{195}\text{Pt}$  spectra. The co-added spectra are shown above the CPMG spikelets. For  $1/\text{SBA-15}$  the  $^{195}\text{Pt}$  dephasing profile for site 1 was obtained by plotting combined dephasing for spikelets a and b, while site 2 was obtained by plotting the combined dephasing for spikelets c and d.

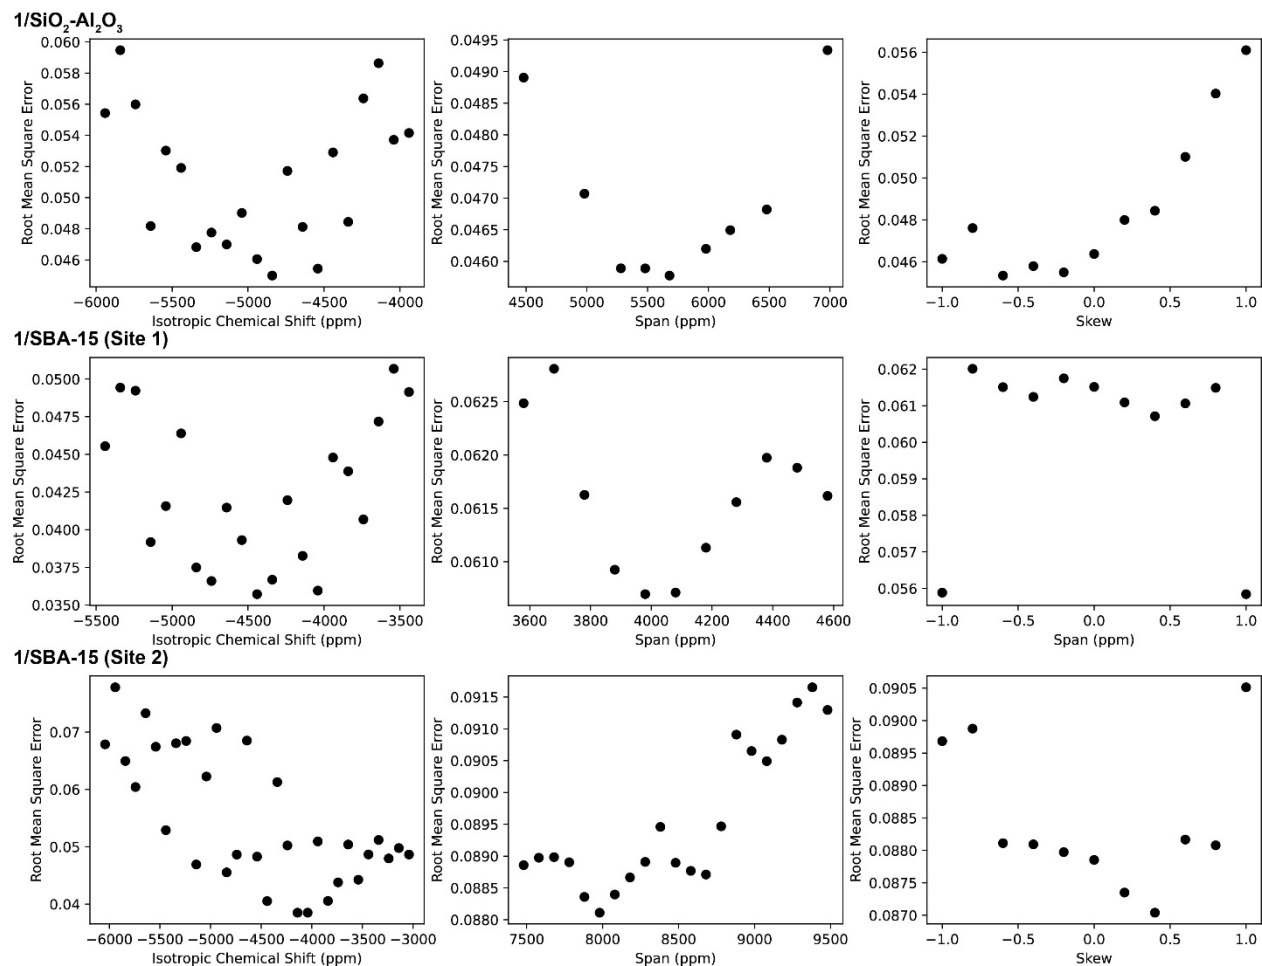

**Figure S12:** Root mean square error plots of the isotropic chemical shift ( $\delta_{iso}$ ), span ( $\Omega$ ), and skew ( $\kappa$ ) for the  $J$ -resolved experiments on  $1/\text{SiO}_2\text{-Al}_2\text{O}_3$  and  $1/\text{SBA-15}$ .

**Table S2:** Calculated and experimental chemical shifts for the hydride and phosphine ligands.

| <b>1/SBA-15</b>                                      |                                           |                                            |                                                              |                                                               |
|------------------------------------------------------|-------------------------------------------|--------------------------------------------|--------------------------------------------------------------|---------------------------------------------------------------|
| <b>Model</b>                                         | <b><sup>1</sup>H Chemical Shift (ppm)</b> | <b><sup>31</sup>P Chemical Shift (ppm)</b> | <b><sup>1</sup>H-<sup>195</sup>Pt <i>J</i>-coupling (Hz)</b> | <b><sup>31</sup>P-<sup>195</sup>Pt <i>J</i>-coupling (Hz)</b> |
| <b>Experiment</b>                                    | -26                                       | 74                                         | 1700                                                         | 2908                                                          |
| <b>Model I</b>                                       | -                                         | 96                                         | -                                                            | 4811                                                          |
| <b>Model II</b>                                      | -                                         | 105                                        | -                                                            | 5321                                                          |
| <b>Model III</b>                                     | -23                                       | 94                                         | 1001                                                         | 3375                                                          |
| <b>Model IV</b>                                      | -26                                       | 99                                         | 1213                                                         | 3315                                                          |
| <b>Model V</b>                                       | -28                                       | 102                                        | 1682                                                         | 3287                                                          |
| <b>Model VI</b>                                      | -31                                       | 104                                        | 1851                                                         | 3297                                                          |
| <b>Model VII</b>                                     | -33                                       | 107                                        | 2086                                                         | 3281                                                          |
| <b>Model VIII</b>                                    | -34                                       | 98                                         | 2505                                                         | 3036                                                          |
| <b>Model IX</b>                                      | -37                                       | 86                                         | 3067                                                         | 2908                                                          |
| <b>1/SiO<sub>2</sub>-Al<sub>2</sub>O<sub>3</sub></b> |                                           |                                            |                                                              |                                                               |
| <b>Model</b>                                         | <b><sup>1</sup>H Chemical Shift (ppm)</b> | <b><sup>31</sup>P Chemical Shift (ppm)</b> | <b><sup>1</sup>H-<sup>195</sup>Pt <i>J</i>-coupling (Hz)</b> | <b><sup>31</sup>P-<sup>195</sup>Pt <i>J</i>-coupling (Hz)</b> |
| <b>Experiment</b>                                    | -35                                       | 74                                         | 2400                                                         | 2433                                                          |
| <b>Model A</b>                                       | -                                         | 90                                         | -                                                            | 4917                                                          |
| <b>Model B</b>                                       | -                                         | 115                                        | -                                                            | 7560                                                          |
| <b>Model C</b>                                       | -29                                       | 81                                         | 1294                                                         | 3595                                                          |
| <b>Model D</b>                                       | -30                                       | 84                                         | 1477                                                         | 3571                                                          |
| <b>Model E</b>                                       | -32                                       | 85                                         | 1882                                                         | 3434                                                          |
| <b>Model F</b>                                       | -35                                       | 84                                         | 2247                                                         | 3271                                                          |

For all the following crystal structures, the atoms are color coded in the following scheme: C = dark gray, H = white, Pt = light gray, P = orange, Cl = green, B = pink, and F = yellow.

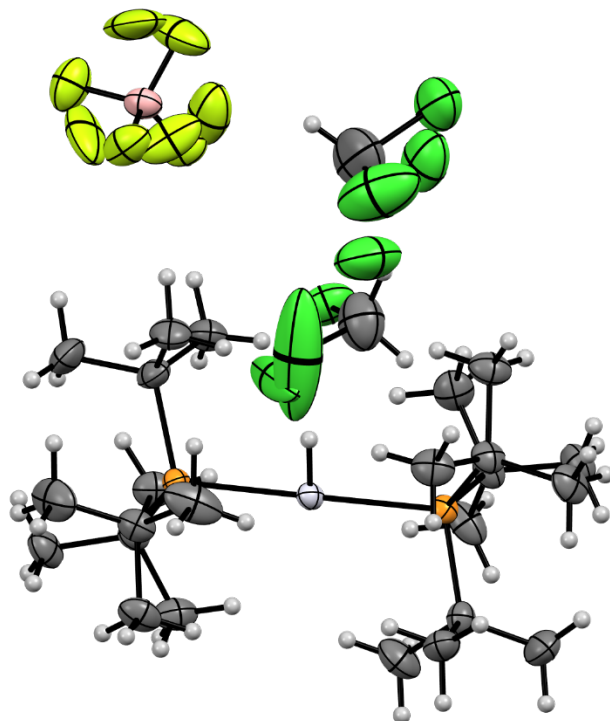

**Figure S13:** Thermal-ellipsoid diagram of the asymmetric unit of  $\text{Pt-H}(\text{P}^t\text{Bu}_3)_2[\text{BF}_4] \cdot 2\text{CH}_2\text{Cl}_2$  **3**. The DCM and  $\text{BF}_4^-$  positions in the crystal structure are disordered for two different reasons. While  $\text{BF}_4^-$  is tetrahedral, resulting in rotational disorder, and  $\text{CH}_2\text{Cl}_2$  is a solvent that adds in free spaces, it shows vibrational disorder from the C-Cl vibration.

**Table S3:** X-ray diffraction parameters of **3**.

| Parameter                     | Pt-H(PtBu <sub>3</sub> ) <sub>2</sub> [BF <sub>4</sub> ] · 2CH <sub>2</sub> Cl <sub>2</sub> ( <b>3</b> ) |
|-------------------------------|----------------------------------------------------------------------------------------------------------|
| Chemical Formula              | C <sub>26</sub> H <sub>59</sub> BC <sub>14</sub> F <sub>4</sub> P <sub>2</sub> Pt                        |
| Crystal size /mm <sup>3</sup> | 0.242 x 0.198 x 0.124                                                                                    |
| Crystal system, Space group   | Monoclinic, Cc                                                                                           |
| Volume /Å <sup>3</sup>        | 3712.06(18)                                                                                              |
| a /Å                          | 11.1587(3)                                                                                               |
| b /Å                          | 19.7667(5)                                                                                               |
| c /Å                          | 16.9439(5)                                                                                               |
| α /°                          | 90                                                                                                       |
| β /°                          | 96.6660(10)                                                                                              |
| γ /°                          | 90                                                                                                       |
| Z                             | 4                                                                                                        |
| Formula weight /Da            | 857.37                                                                                                   |
| μ /mm <sup>-1</sup>           | 4.190                                                                                                    |
| F(000)                        | 1728                                                                                                     |
| Temperature /K                | 150(2)                                                                                                   |
| Total reflections             | 31125                                                                                                    |
| Unique reflections            | 9210 [R <sub>int</sub> = 0.0259]                                                                         |
| Final R indices (I > 2σ(I))   | R1 = 0.0239, wR2 = 0.0512                                                                                |
| Largest diff. peak / hole     | 1.089 / -0.839                                                                                           |
| GOF                           | 1.033                                                                                                    |

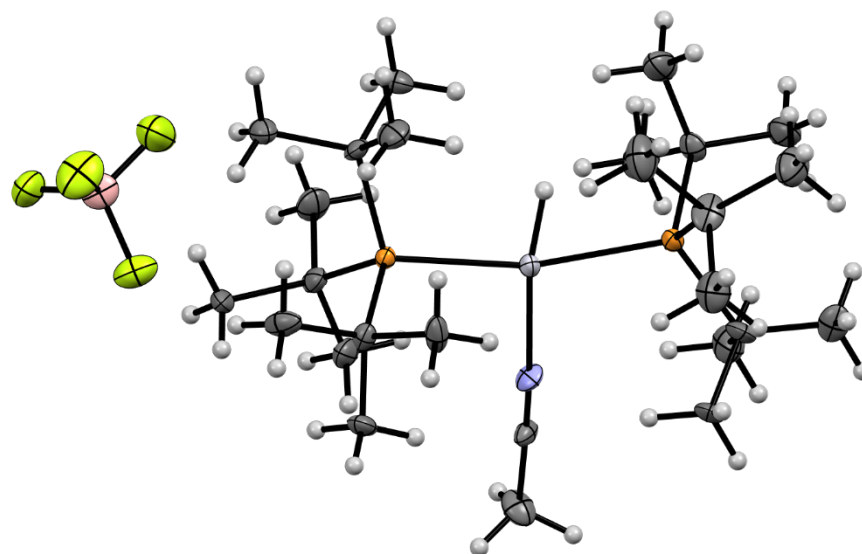

**Figure S14:** Thermal-ellipsoid diagram of the asymmetric unit of Pt-H(PtBu<sub>3</sub>)<sub>2</sub>(CH<sub>3</sub>CN)[BF<sub>4</sub>] **4**.

**Table S4:** X-ray diffraction parameters of **4**.

| Parameter                     | Pt-H(PtBu <sub>3</sub> ) <sub>2</sub> (CH <sub>3</sub> CN)[BF <sub>4</sub> ] ( <b>4</b> ) |
|-------------------------------|-------------------------------------------------------------------------------------------|
| Chemical Formula              | C <sub>26</sub> H <sub>58</sub> BF <sub>4</sub> NP <sub>2</sub> Pt                        |
| Crystal size /mm <sup>3</sup> | 0.073 x 0.062 x 0.043                                                                     |
| Crystal system, Space group   | Monoclinic, P2(1)/n                                                                       |
| Volume /Å <sup>3</sup>        | 3095.2(14)                                                                                |
| a /Å                          | 8.585(2)                                                                                  |
| b /Å                          | 12.110(3)                                                                                 |
| c /Å                          | 29.773(6)                                                                                 |
| α /°                          | 90                                                                                        |
| β /°                          | 96.461(9)                                                                                 |
| γ /°                          | 90                                                                                        |
| Z                             | 4                                                                                         |
| Formula weight /Da            | 728.57                                                                                    |
| μ /mm <sup>-1</sup>           | 4.677                                                                                     |
| F(000)                        | 1480                                                                                      |
| Temperature /K                | 150(2)                                                                                    |
| Total reflections             | 28228                                                                                     |
| Unique reflections            | 7714 [R <sub>int</sub> = 0.1200]                                                          |
| Final R indices (I > 2σ(I))   | R1 = 0.0863, wR2 = 0.1705                                                                 |
| Largest diff. peak / hole     | 5.440 / -3.319                                                                            |
| GOF                           | 1.046                                                                                     |



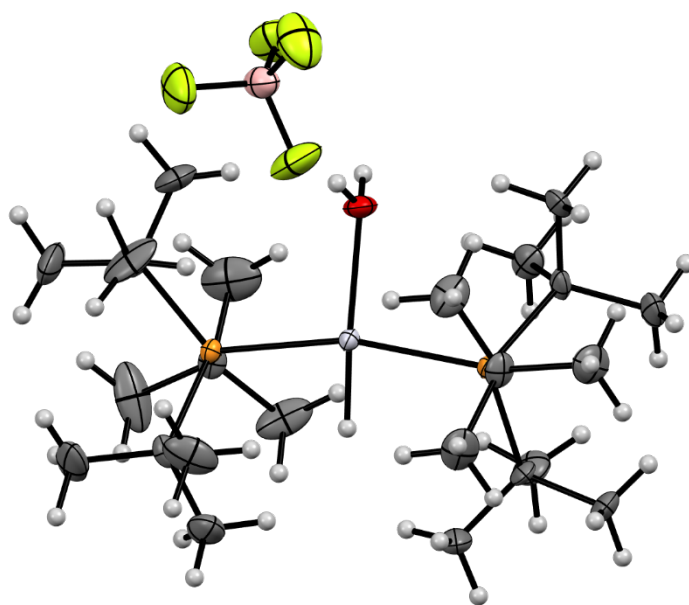

**Figure S15:** Thermal-ellipsoid diagram of the asymmetric unit of Pt-H(P<sup>t</sup>Bu<sub>3</sub>)<sub>2</sub>(H<sub>2</sub>O)[BF<sub>4</sub>] **5**.

**Table S5:** X-ray diffraction parameters of **5**.

| Parameter                     | Pt-H(P <sup>t</sup> Bu <sub>3</sub> ) <sub>2</sub> (H <sub>2</sub> O)[BF <sub>4</sub> ] ( <b>5</b> ) |
|-------------------------------|------------------------------------------------------------------------------------------------------|
| Chemical Formula              | C <sub>24</sub> H <sub>57</sub> BF <sub>4</sub> OP <sub>2</sub> Pt                                   |
| Crystal size /mm <sup>3</sup> | 0.143 x 0.099 x 0.074                                                                                |
| Crystal system, Space group   | Monoclinic, P2(1)/c                                                                                  |
| Volume /Å <sup>3</sup>        | 3032.62(16)                                                                                          |
| a /Å                          | 11.5231(4)                                                                                           |
| b /Å                          | 16.5896(4)                                                                                           |
| c /Å                          | 16.5713(5)                                                                                           |
| α /°                          | 90                                                                                                   |
| β /°                          | 106.800(2)                                                                                           |
| γ /°                          | 90                                                                                                   |
| Z                             | 4                                                                                                    |
| Formula weight /Da            | 705.53                                                                                               |
| μ /mm <sup>-1</sup>           | 4.772                                                                                                |
| F(000)                        | 1432                                                                                                 |
| Temperature /K                | 150(2)                                                                                               |
| Total reflections             | 28688                                                                                                |
| Unique reflections            | 7528 [R <sub>int</sub> = 0.0787]                                                                     |
| Final R indices (I > 2σ(I))   | R1 = 0.0412, wR2 = 0.0523                                                                            |
| Largest diff. peak / hole     | 1.218 / -1.158                                                                                       |
| GOF                           | 1.014                                                                                                |

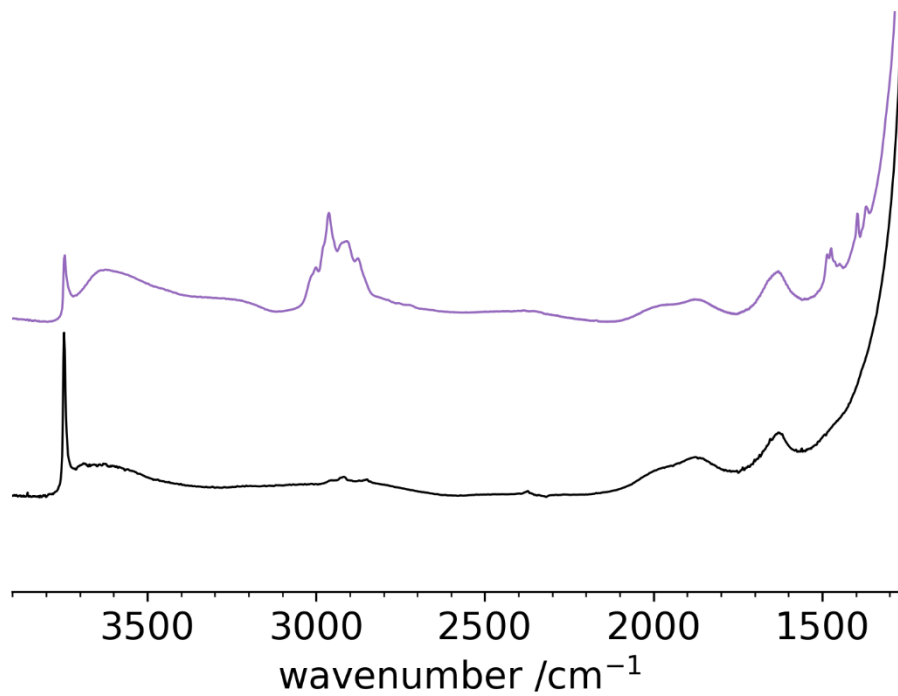

**Figure S16:** IR-spectrum of SiO<sub>2</sub>-Al<sub>2</sub>O<sub>3</sub>-500 dehydroxylated at 500°C (bottom, black) and Pt-H@SiO<sub>2</sub>-Al<sub>2</sub>O<sub>3</sub>-500 (top, purple).

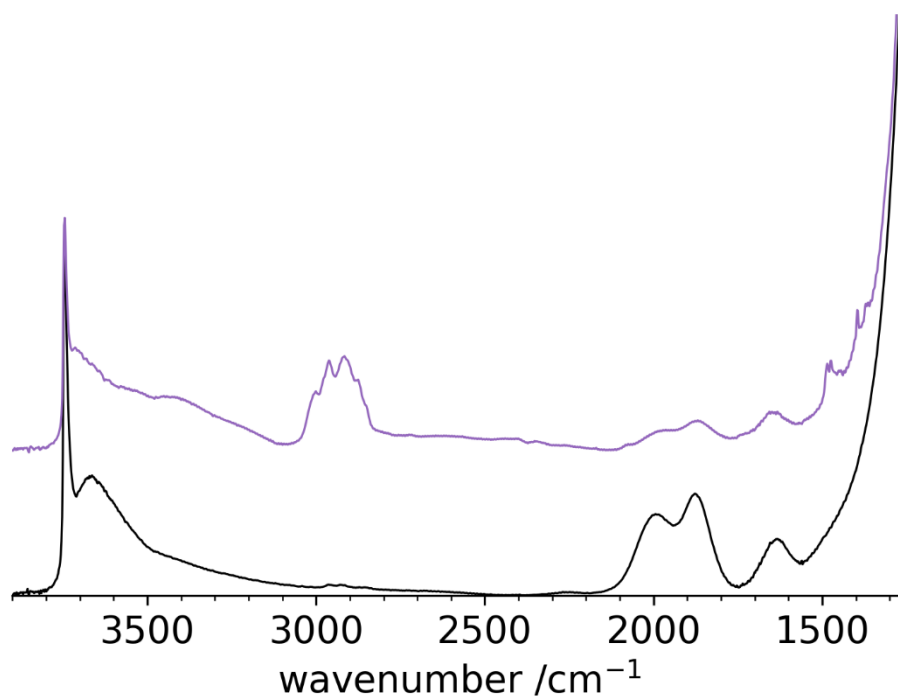

**Figure S17:** IR-spectrum of SBA-15-500 dehydroxylated at 500°C (bottom, black) and Pt-H@Silica-500 (top, purple).

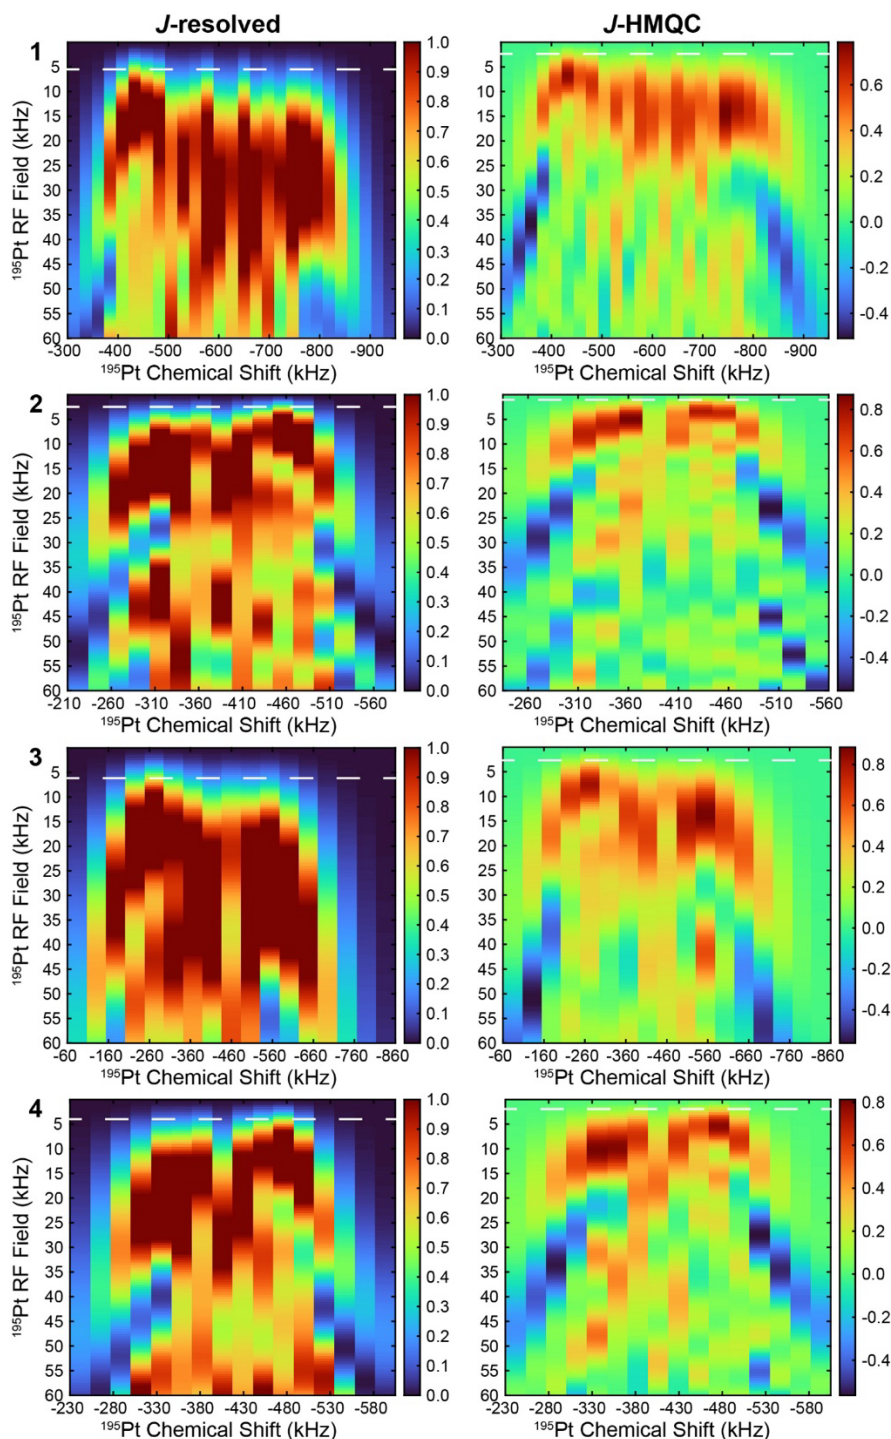

**Figure S18:** SIMPSON calculated  $^{31}\text{P}$  signal dephasing or efficiency for  $^1\text{H}\text{-}^{31}\text{P}\{^{195}\text{Pt}\}$  and  $^1\text{H}\{^{195}\text{Pt}\}$   $J$ -resolved and  $J$ -HMQC sideband selective experiments, respectively, as a function of the  $^{195}\text{Pt}$  saturation radiofrequency (RF) field. Heat maps are labeled 1 through 4, corresponding to molecular complexes 1 through 4. Simulations for 1 used a 25 kHz spinning frequency and 80  $\mu\text{s}$  saturation pulses, 2 used a 25 kHz spinning frequency and 120  $\mu\text{s}$  saturation pulses, 3 used a 50 kHz spinning frequency and 60  $\mu\text{s}$  saturation pulses, and 4 used a 25 kHz spinning frequency and 80  $\mu\text{s}$  saturation pulses. A white dashed line indicates the optimal RF field for all heat maps.

**Table S6:** Optimal  $^{195}\text{Pt}$  saturation RF fields for the molecular precursors

| <b>Complex</b> | <b><i>J</i>-resolved (kHz)</b> | <b><i>J</i>-HMQC (kHz)</b> |
|----------------|--------------------------------|----------------------------|
| <b>1</b>       | 6                              | 3                          |
| <b>2</b>       | 3                              | 2                          |
| <b>3</b>       | 7                              | 3                          |
| <b>4</b>       | 4                              | 2                          |
